# Supplementary material
Source: PubMed Central journal article supplement (PMC6235728)
Supplement: NIHMS1508363-supplement-3.pdf [file NIHMS1508363-supplement-3.pdf]

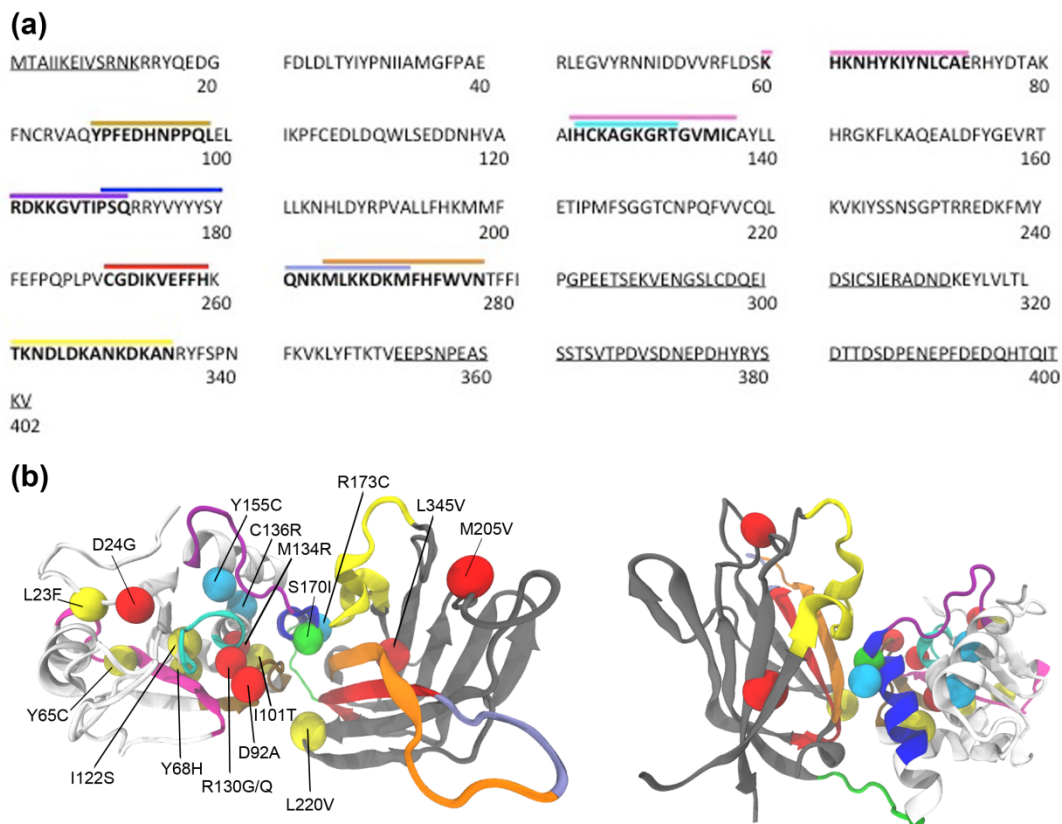

**Figure S1. Human PTEN sequence and ASD- vs. cancer-associated mutations at**

**structure level.** (a) Primary amino acid sequence of human PTEN and (b) 17 germline *PTEN* missense mutations (spheres) mapped to the three-dimensional structure of WT PTEN. The P-, WPD-, and TI-loops are highlighted in cyan, brown, and purple, respectively. ATP-binding motif type A (residues 60-73) is indicated in pink (type B, residues 122-136 overlaps the P loop). Inter-domain region motifs 1, 2, 3, and 4 are highlighted in dark blue, red, orange, and yellow, respectively.

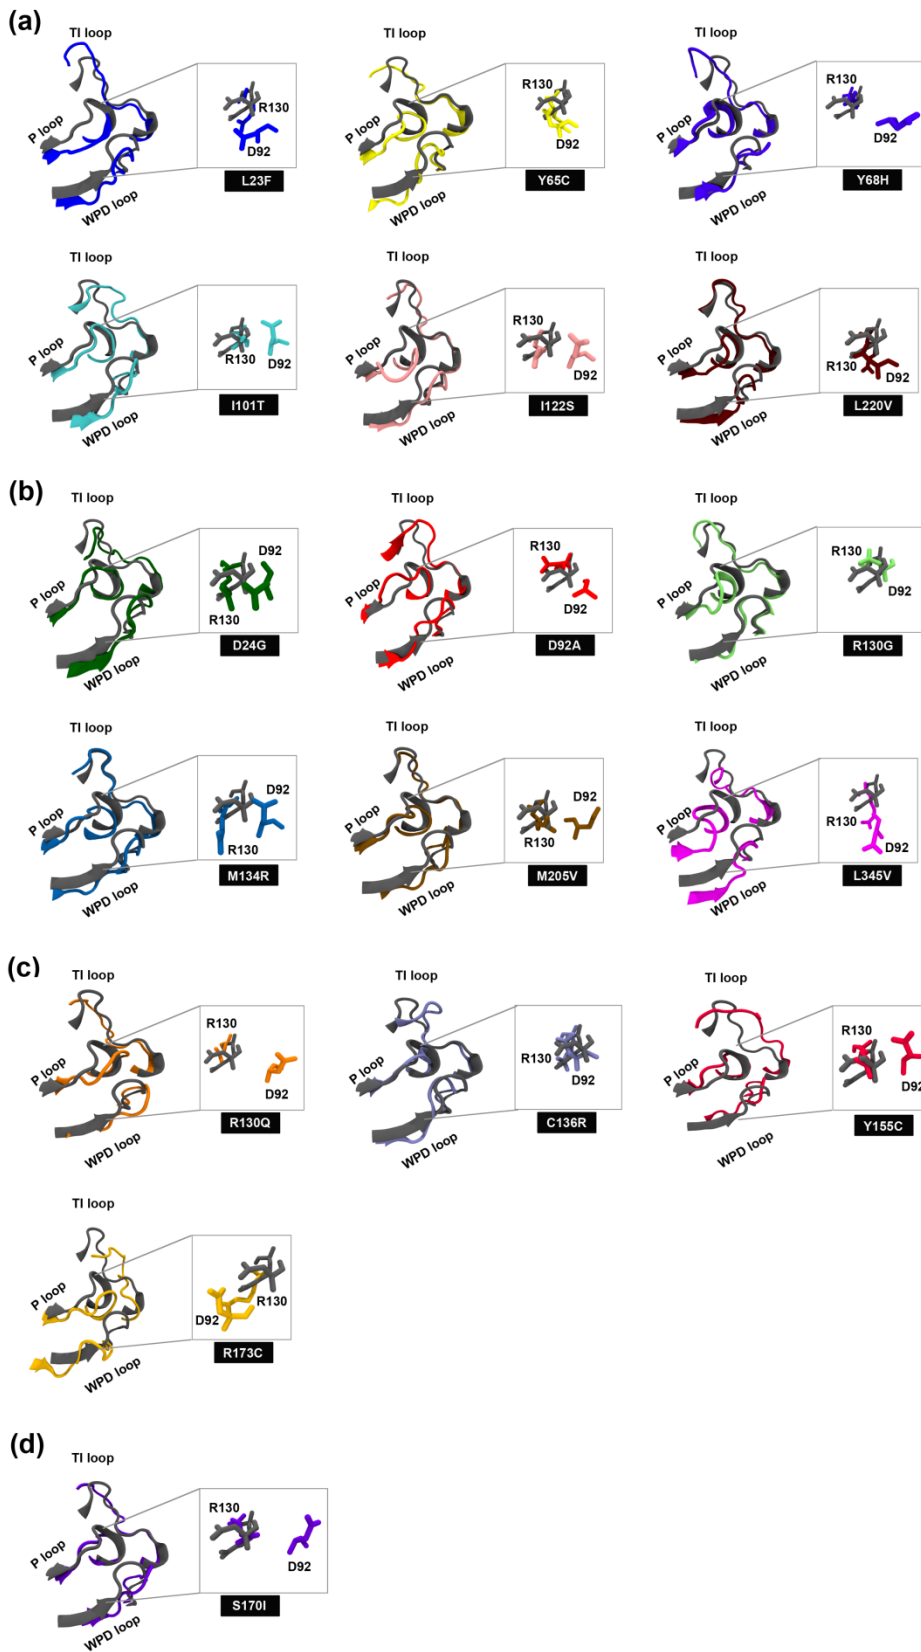

bioRxiv preprint doi: <https://doi.org/10.1101/2023.08.15.554441>; this version posted August 15, 2023. The copyright holder for this preprint (which was not certified by peer review) is the author/funder, who has granted bioRxiv a license to display the preprint in perpetuity. It is made available under aCC-BY-NC-ND 4.0 International license.

**Figure S2. Conformational analysis of catalytic active site in ASD- vs. cancer-associated mutations.** The catalytic P-, WPD-, and TI-loops illustrate the conformational changes in (a) ASD (only), (b) cancer (only), (c) mutations shared across both phenotypes, and (d) one mutation with coexisting phenotypes in comparison to WT PTEN. Catalytic residues D92 and R130 are indicated in the separate exploded box depicting the orientations as a result of the mutation and subsequent conformational change.

Table S3. Patient Cohort Median and Age Ranges

|                             | No. of Patients | Mean or Median Age |         |
|-----------------------------|-----------------|--------------------|---------|
|                             |                 | Median             | Range   |
| ASD (only)                  | 6               | 17                 | 10 – 31 |
| Cancer (only)               | 6               | 60                 | 52 – 71 |
| ASD or Cancer (shared)      | 22              | 44                 | 8 – 80  |
| ASD and Cancer (coexisting) | 1               | 30                 | 30      |

Table S3. Rigid vs. Flexible Inter-domain region – Disease Burden

| <b>Cancer (only) n=6</b>               |                  |                    |                    |                    |                   |                |                |                |
|----------------------------------------|------------------|--------------------|--------------------|--------------------|-------------------|----------------|----------------|----------------|
| <b>Genotype</b>                        | <b>Phenotype</b> |                    |                    |                    |                   |                |                |                |
|                                        | <b>Breast</b>    | <b>Cervical</b>    | <b>Endometrial</b> | <b>Leukemia</b>    | <b>Skin</b>       | <b>Thyroid</b> | <b>Uterine</b> |                |
| p.D24G                                 |                  |                    | ✓                  | ✓                  |                   |                |                |                |
| p.D92A                                 | ✓                |                    |                    |                    |                   |                |                |                |
| p.R130G                                | ✓                |                    |                    |                    |                   |                |                |                |
| p.M134R                                |                  |                    |                    |                    |                   | ✓              |                |                |
| p.M205V                                | ✓                | ✓                  |                    |                    |                   |                |                |                |
| p.L345V                                | ✓                |                    |                    |                    | ✓                 |                | ✓              |                |
| <b>ASD or Cancer (only) n=4</b>        |                  |                    |                    |                    |                   |                |                |                |
| <b>Genotype</b>                        | <b>Phenotype</b> |                    |                    |                    |                   |                |                |                |
|                                        | <b>ASD</b>       | <b>Breast</b>      | <b>Cervical</b>    | <b>Endometrial</b> | <b>Esophageal</b> | <b>Ovarian</b> | <b>Skin</b>    | <b>Thyroid</b> |
| p.R130Q                                | ✓                | ✓                  | ✓                  |                    | ✓                 | ✓              |                |                |
| p.C136R                                | ✓                | ✓                  |                    | ✓                  |                   |                |                | ✓              |
| p.Y155C                                | ✓                | ✓                  |                    |                    |                   |                |                |                |
| p.R173C                                | ✓                |                    |                    |                    |                   | ✓              | ✓              | ✓              |
| <b>ASD and Cancer (coexisting) n=1</b> |                  |                    |                    |                    |                   |                |                |                |
| <b>Genotype</b>                        | <b>Phenotype</b> |                    |                    |                    |                   |                |                |                |
|                                        | <b>ASD</b>       | <b>Endometrial</b> | <b>Ovarian</b>     | <b>Thyroid</b>     |                   |                |                |                |
| p.S170I                                | ✓                | ✓                  | ✓                  | ✓                  |                   |                |                |                |
